# Supplementary material for: Fabrication of Aligned Side‐by‐Side TiO2/SnO2 Nanofibers via Dual‐Opposite‐Spinneret Electrospinning
Source: Hindawi journal article supplement (doi:10.1155/2012/575926), 2012-01-01
Supplement: f1 [file 575926.f1.docx]

**Supplementary Materials: S1**

There were not very clear side-by-side structures in the original image **Figure 1b**, especially when it was printed out in general printers. Thus, in order to show the side-by-side structures clearly, four small areas of **Figure 1b** were enlarged using the software Adobe® Photoshop® CS 8.0.1. First we selected a small area in original image, such as “area a” shown in **Figure S1**; then we used the Crop tool to enlarge the selected “area a”, and got the image **Figure S2a**. The size of “area a” was 243 by 120 pixels，and the size of **Figure S2a** was 972 by 480 pixels. After enlarging, it was obviously that most of the electrospun fibers had side-by-side structure. However, because of the angle of observation, a side-by-side structure could appear as fifty-fifty, or twenty-eighty, or ten-ninety, even only one part could be seen.


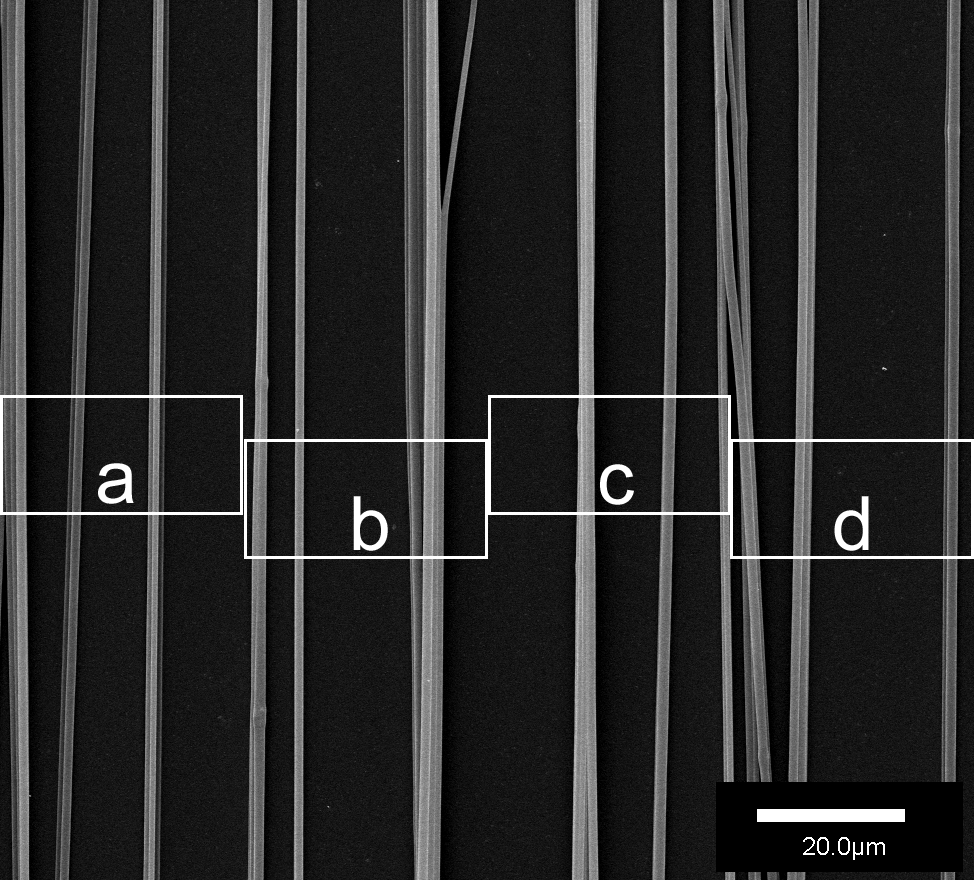


**Figure S1** Selected areas in original image.


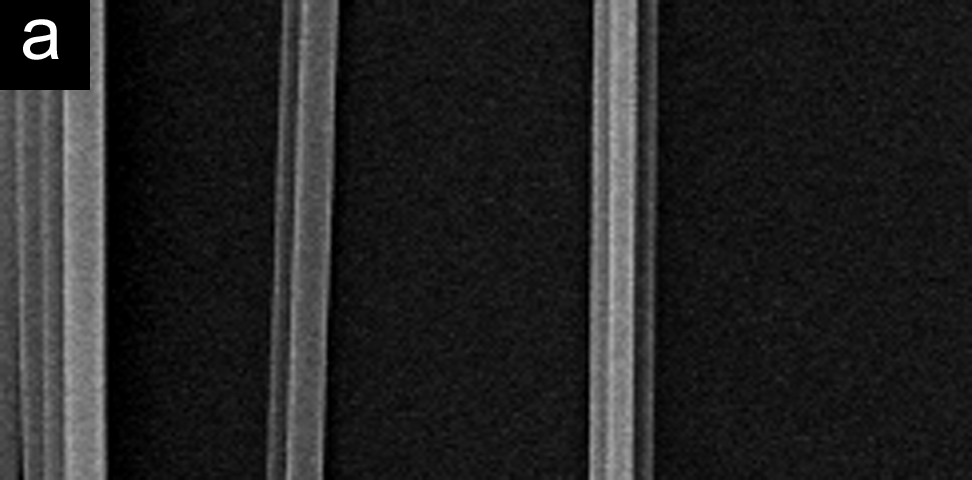

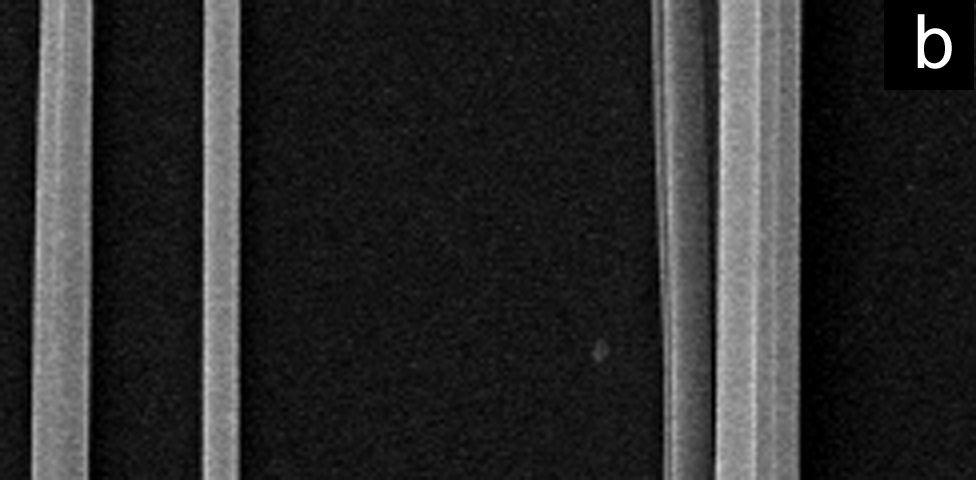


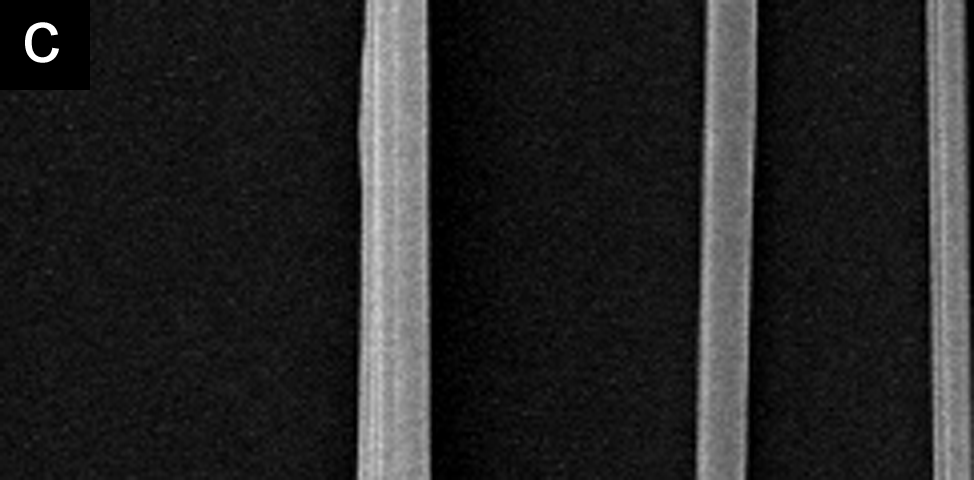

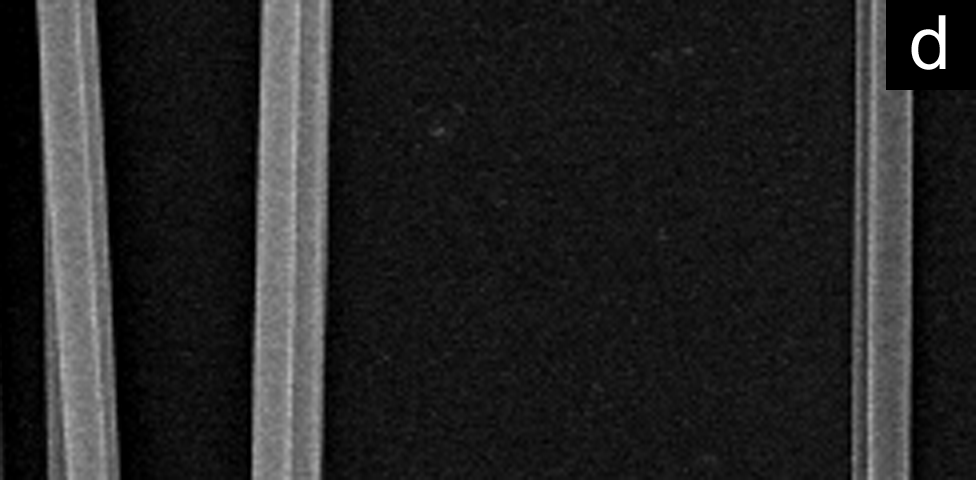


**Figure S2** Enlarged images after image processing.
